# Supplementary material
Source: PubMed Central journal article supplement (PMC5529610)
Supplement: mmc1.pdf [file mmc1.pdf]

**Biophysical Journal, Volume 113**

**Supplemental Information**

**Enhancing Irreversible Electroporation by Manipulating Cellular Biophysics with a Molecular Adjuvant**

**Jill W. Ivey, Eduardo L. Latouche, Megan L. Richards, Glenn J. Lesser, Waldemar Debinski, Rafael V. Davalos, and Scott S. Verbridge**

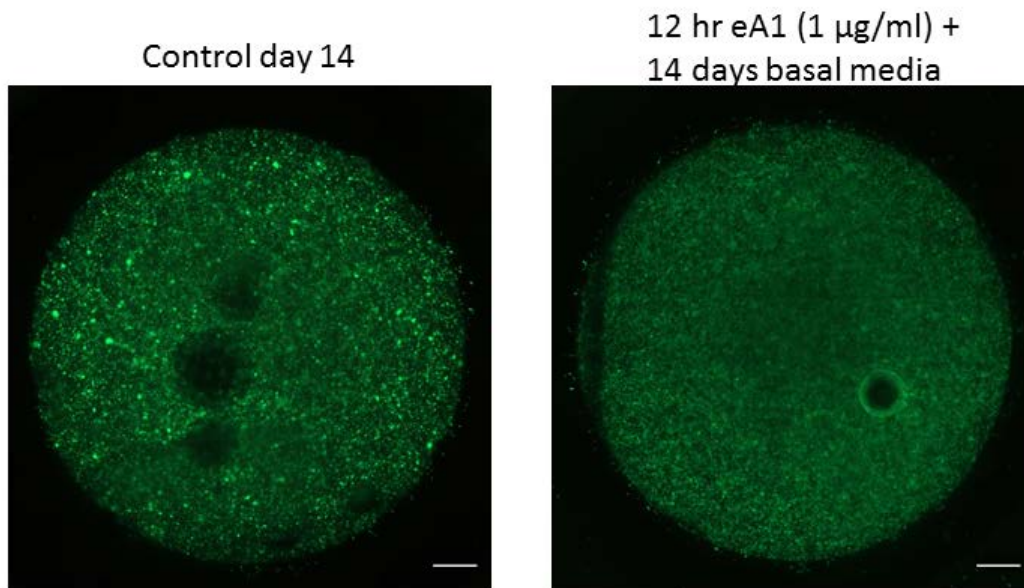

**Figure S1. Live dead staining of cells cultured with eA1 in hydrogels.** Cells were cultured in collagen hydrogels with 1  $\mu\text{g}/\text{ml}$  eA1 media for 12 h, which was then replaced with basal media and cells were cultured out to 14 days. Calciin AM staining of the live cells (green) and ethD-III staining of dead cells (red) shows no visible cell death for eA1 treatment. Scale bar 1 mm.

**Table S1:** Physical properties used in finite element models of hydrogel treatments. \* measured values, ‡ default material values in COMSOL

| Parameter                        | Symbol       | Value              | Unit                 | Reference |
|----------------------------------|--------------|--------------------|----------------------|-----------|
| IRE Voltage                      | $V_{IRE}$    | 450                | [V]                  | *         |
| H-FIRE Voltage                   | $V_{HFIRE}$  | 450-700            | [V]                  | *         |
| Electrode Density                | $\rho_e$     | 7850               | [kg/m <sup>3</sup> ] | ‡         |
| Electrode Specific Heat Capacity | $Cp_e$       | 475                | [J/(kg·K)]           | ‡         |
| Electrode Thermal Conductivity   | $k_e$        | 44.5               | [W/(m·K)]            | ‡         |
| Electrode Conductivity           | $\sigma_e$   | $4.03 \times 10^6$ | [S/m]                | ‡         |
| Electrode Permittivity           | $\epsilon_e$ | 1                  |                      | ‡         |
| Hydrogel Density                 | $\rho_h$     | 997.8              | [kg/m <sup>3</sup> ] | (45)      |
| Hydrogel Specific Heat Capacity  | $Cp_h$       | 4181.8             | [J/(kg·K)]           | (45)      |
| Hydrogel Thermal Conductivity    | $k_h$        | 0.6                | [W/(m·K)]            | (45)      |
| Hydrogel Conductivity            | $\sigma_h$   | 1.2                | [S/m]                | (45)      |
| Hydrogel Permittivity            | $\epsilon_h$ | 0                  |                      | (45)      |

**Table S2:** *Physical properties used in finite element models of single cells. \* measured values, ‡ approximation based on water composition*

| Parameter                              | Symbol                   | Value                 | Units | Reference |
|----------------------------------------|--------------------------|-----------------------|-------|-----------|
| Media Conductivity                     | $\sigma_m$               | 0.98                  | [S/m] | *         |
| Media Permittivity                     | $\epsilon_m$             | $80\epsilon_0$        | [F/m] | ‡         |
| Cytoplasm Conductivity                 | $\sigma_{\text{cyt}}$    | 0.3                   | [S/m] | (46)      |
| Cytoplasm Permittivity                 | $\epsilon_{\text{cyt}}$  | $154.4\epsilon_0$     | [F/m] | (47)      |
| Nucleoplasm Conductivity               | $\sigma_{\text{nuc}}$    | 1.35                  | [S/m] | (46)      |
| Nucleoplasm Permittivity               | $\epsilon_{\text{nuc}}$  | $52\epsilon_0$        | [F/m] | (46)      |
| Cell Membrane Thickness                | $t_{\text{mem}}$         | $5 \times 10^{-9}$    | [m]   | (48)      |
| Nuclear Membrane Thickness             | $t_{\text{Nmem}}$        | $40 \times 10^{-9}$   | [m]   | (46)      |
| Cell Membrane Conductivity             | $\sigma_{\text{mem}}$    | $3 \times 10^{-7}$    | [S/m] | (49)      |
| Cell Membrane Permittivity             | $\epsilon_{\text{mem}}$  | $8.57\epsilon_0$      | [F/m] | (50)      |
| Nuclear Membrane Conductivity          | $\sigma_{\text{Nmem}}$   | $6 \times 10^{-3}$    | [S/m] | (46)      |
| Nuclear Membrane Permittivity          | $\epsilon_{\text{Nmem}}$ | $28\epsilon_0$        | [F/m] | (46)      |
| Domain Side Length                     | $L_d$                    | $300 \times 10^{-6}$  | [m]   | -         |
| Benign Cell Radius                     | $R_c$                    | $20 \times 10^{-6}$   | [m]   | *         |
| Benign Nuclear Radius                  | $R_n$                    | $6.2 \times 10^{-6}$  | [m]   | *         |
| Malignant Cell Radius                  | $R_{mc}$                 | $20 \times 10^{-6}$   | [m]   | *         |
| Malignant Nuclear Radius               | $R_{mn}$                 | $14.7 \times 10^{-6}$ | [m]   | *         |
| Malignant Cell Radius (post-ephrin)    | $R_{mce}$                | $16.7 \times 10^{-6}$ | [m]   | *         |
| Malignant Nuclear Radius (post-ephrin) | $R_{mne}$                | $14.7 \times 10^{-6}$ | [m]   | *         |

## **References**

45. Rubinsky, B. 2007. Irreversible electroporation in medicine. *Technology in cancer research & treatment* 6:255-259.
46. Asami, K., Y. Takahashi, and S. Takashima. 1989. Dielectric-Properties of Mouse Lymphocytes and Erythrocytes. *Biochim Biophys Acta* 1010:49-55.
47. Yang, J., Y. Huang, X. J. Wang, X. B. Wang, F. F. Becker, and P. R. C. Gascoyne. 1999. Dielectric properties of human leukocyte subpopulations determined by electrorotation as a cell separation criterion. *Biophysical Journal* 76:3307-3314.
48. Gascoyne, P. R. C., R. Pethig, J. P. H. Burt, and F. F. Becker. 1993. Membrane-Changes Accompanying the Induced-Differentiation of Friend Murine Erythroleukemia-Cells Studied by Dielectrophoresis. *Biochim Biophys Acta* 1149:119-126.
49. Sano, M. B., E. A. Henslee, E. M. Schmelz, and R. V. Davalos. 2011. Contactless dielectrophoretic spectroscopy: Examination of the dielectric properties of cells found in blood. *Electrophoresis* 32:3164-3171.
50. Alberts, B., D. Bray, J. Lewis, M. Raff, K. Roberts, J. D. Watson, and A. Grimstone. 1995. *Molecular Biology of the Cell* (3rd edn). *Trends in Biochemical Sciences* 20:210-210.
51. Huang, S.-H., L.-Y. Hung, and G.-B. Lee. 2016. Continuous nucleus extraction by optically-induced cell lysis on a batch-type microfluidic platform. *Lab on a Chip* 16:1447-1456.
